# Supplementary material for: Allowing more time to ILCOR Step A of neonatal resuscitation leads to better residents’ task completion in simulated scenarios. A problem of time pressure?
Source: Springer Nature journal article supplement (doi:10.1186/s12887-020-02217-3), 2020-07-03
Supplement: MOESM1 [file 18145972]

## Sessions structure for 1st year pediatric residents

| Number | Scenarios                                                         | Learning objectives                                                                                                                                                                                                                                                                                             | Goals to achieve                                                                                                                                                                       |
|--------|-------------------------------------------------------------------|-----------------------------------------------------------------------------------------------------------------------------------------------------------------------------------------------------------------------------------------------------------------------------------------------------------------|----------------------------------------------------------------------------------------------------------------------------------------------------------------------------------------|
| 1      | Assessment of the newborn<br>Step A                               | Objective 1: Initiate resuscitation with correct Phase A<br>Objective 2: Recognition of a newborn not requiring PPV                                                                                                                                                                                             | -Realize complete phase A in less than 60 seconds                                                                                                                                      |
| 2      | Initiating PPV<br>Step B                                          | <b>Objective 1: Initiate resuscitation with correct Phase A</b><br>Objective 2: Recognition of a newborn requiring PPV<br>Objective 3: Demonstrate correct technique for positive ventilation, including placement of mask on the newborn's face, rate and pressure, and corrective actions for ineffective PPV | <b>-Realize complete phase A in less than 60 seconds</b><br><b>-Initiate PPV before 60 seconds WITH a complete phase A before</b>                                                      |
| 3      | Initiating PPV in a context of meconial amniotic fluid<br>Step B  | Objective 1: Initiate resuscitation with correct Phase A<br>Objective 2: Recognition of a newborn requiring PPV<br>Objective 3: Apply recommendation of ventilation in a context of meconial amniotic fluid                                                                                                     | -Realize complete phase A in less than 60 seconds<br>-Initiate PPV before 60 seconds with a complete phase A before<br>-Deny intubation                                                |
| 4      | Initiating PPV and assess dependency to PPV<br>Step B             | <b>Objective 1: Initiate resuscitation with correct Phase A</b><br>Objective 2: Start PPV in the right time<br>Objective 3: Demonstrate correct technique for positive ventilation, including placement of mask on the newborn's face, rate and pressure, and corrective actions for ineffective PPV            | <b>-Realize complete phase A in less than 60 seconds</b><br><b>-Initiate PPV before 60 seconds with a complete phase A before</b><br>-Assess dependency to the PPV, discuss intubation |
| 5      | Initiating PPV and discussing Chest compression<br>Step B± Step C | Objective 1: Initiate resuscitation with correct Phase A<br>Objective 2: Start PPV in the right time<br>Objective 3: Assess the opportunity to start chest compressions                                                                                                                                         | -Realize complete phase A in less than 60 seconds<br>-Initiate PPV before 60 seconds with a complete phase A before<br>-Don't start chest compressions                                 |

Caption: In bold characters, elements linked to the study
