# Supplementary material for: Allowing more time to ILCOR Step A of neonatal resuscitation leads to better residents’ task completion in simulated scenarios. A problem of time pressure?
Source: Springer Nature journal article supplement (doi:10.1186/s12887-020-02217-3), 2020-07-03
Supplement: MOESM2 [file 18145972]

# CELESTINE (OP2-1)

PHASE B  
Sim new B

| <b>Scenario Script Célestine</b>                       |                                                                                                                                                                                                                                                                                                                                                                                                                                                                                                                                                                                                                                                                                                                                                                 |
|--------------------------------------------------------|-----------------------------------------------------------------------------------------------------------------------------------------------------------------------------------------------------------------------------------------------------------------------------------------------------------------------------------------------------------------------------------------------------------------------------------------------------------------------------------------------------------------------------------------------------------------------------------------------------------------------------------------------------------------------------------------------------------------------------------------------------------------|
| <b>Case Presentation (to be read to participants):</b> | <p>You are called to attend a vaginal delivery of a 39-week infant because of difficult assisted delivery. The estimated weight is 3,000 grams (3 kg).</p> <p>The mother is 30-year-old, G1 P1. The pregnancy was uncomplicated. The labour started spontaneously 12 hours ago. The amniotic fluid was clear.</p> <p>The foetal heart rate was normal</p> <p>The mother has been in the second stage of labour for 2 hours, and within the last 20 minutes, foetal heart rate tracings have become concerning due to intermittent late decelerations.</p> <p>The obstetrical team decided an assisted delivery by vacuum extraction. The extraction is difficult. At birth, the infant is noted to have tight nuchal cord x 2 requiring surgical reduction.</p> |
| <b>Facilitator 1 Midwife</b>                           | <ul style="list-style-type: none"> <li>• <b>Bold Point in prebriefing →</b></li> <li>• Make feel it could be a stressfull situation</li> <li>• Exit from the room, learners have to prepare what they could need</li> <li>• <b>Role in the scenario</b> <ul style="list-style-type: none"> <li>○ Come with the newborn, tells she doesn't cry and she is floppy</li> <li>○ Birthweight is heavier, more than 4000g</li> <li>○ She has to leave because there is a second delivery in another delivery room</li> <li>○ If learners stucked, suggests ventilation</li> </ul> </li> </ul>                                                                                                                                                                          |

| <b>Pedagogic sheet</b>                |                                                                                                                                                                                                                |
|---------------------------------------|----------------------------------------------------------------------------------------------------------------------------------------------------------------------------------------------------------------|
| <b>Learning objectives</b>            | <p>Objective 1: Initiate resuscitation with correct Phase A</p> <p>Objective 2: Recognition of a newborn requiring PPV</p>                                                                                     |
| <b>Stage of the scenario Trigger:</b> | <b>Initial state:</b> RR 6/min, SpO <sub>2</sub> 65%, HR 80/min, weak cry                                                                                                                                      |
| <b>1-Ventilation</b>                  | <b>Ventilation:</b><br>RR 40/min, SpO <sub>2</sub> 80%, HR 130/min, increase HR after 20 seconds of ventilation                                                                                                |
| <b>2- If no action</b>                | <b>No ventilation:</b> Trigger Time 1 mn 10" leads to bradycardia 65 stop weak cry.                                                                                                                            |
| <b>3 Scenario's ending</b>            | RR 55/min, SpO <sub>2</sub> 90%, HR 150/min at 5 minutes                                                                                                                                                       |
| <b>Key points of the debriefing</b>   | <ul style="list-style-type: none"> <li>• <b>PPV at the right time</b></li> <li>• <b>Communication between learners</b> <ul style="list-style-type: none"> <li>○ ILCOR Step A</li> <li>○</li> </ul> </li> </ul> |
